# Supplementary material for: Development and evaluation of an improved offline aerosol mass spectrometry technique
Source: Copernicus journal article supplement (doi:10.5194/amt-16-2837-2023), 2023-06-07
Supplement: Supplementary file 1 [file amt-16-2837-2023-supplement.pdf]

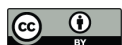

*Supplement of*

## **Development and evaluation of an improved offline aerosol mass spectrometry technique**

**Christina N. Vasilakopoulou et al.**

*Correspondence to:* Spyros N. Pandis ([spyros@chemeng.upatras.gr](mailto:spyros@chemeng.upatras.gr))

The copyright of individual parts of the supplement might differ from the article licence.

## S1. Patras 2020 winter campaign

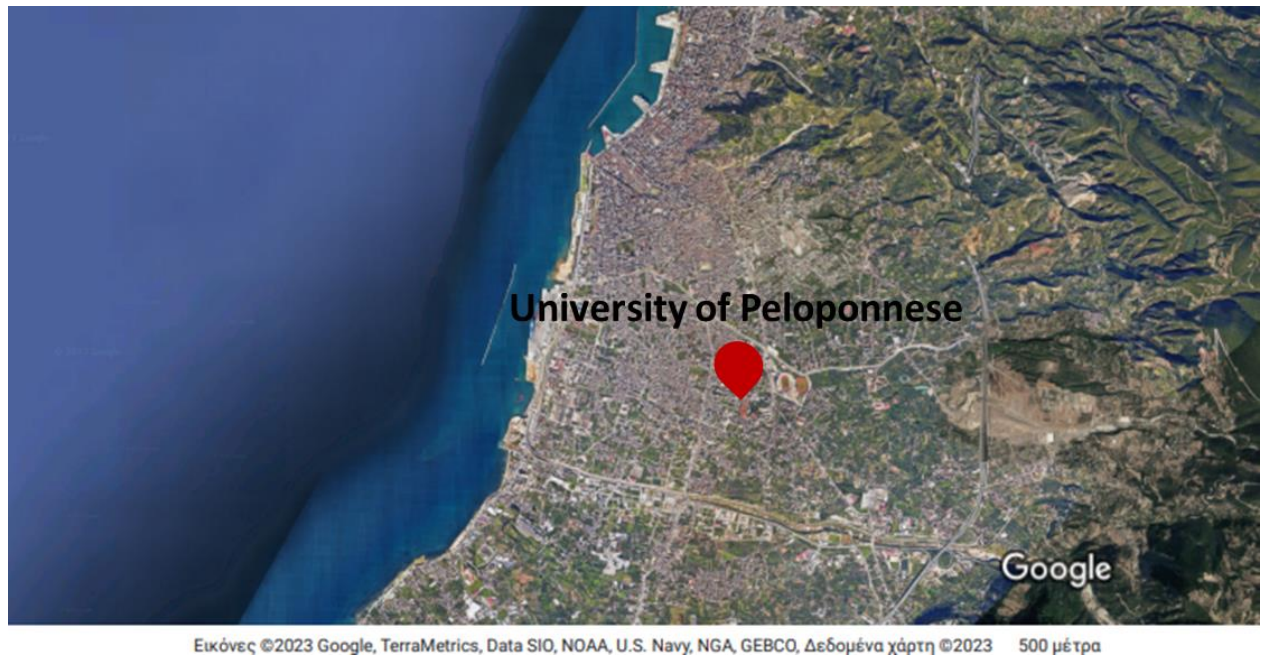

**Figure S1:** Map of the sampling site for the Patras campaign. The map was obtained by Google maps.

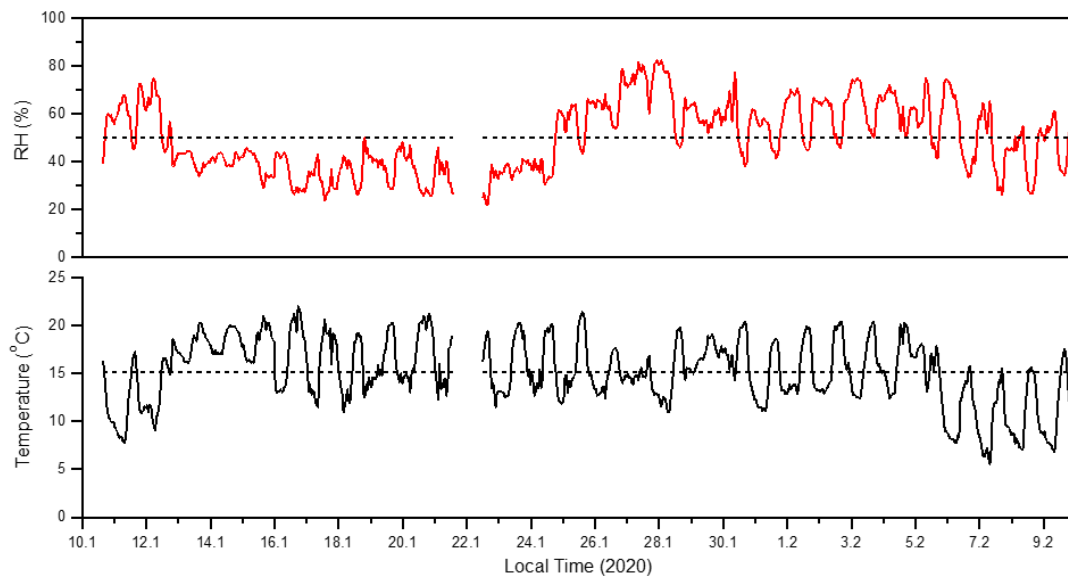

**Figure S2:** Ambient temperature and relative humidity time series for the Patras 2020 campaign.

## S1.1 On-line

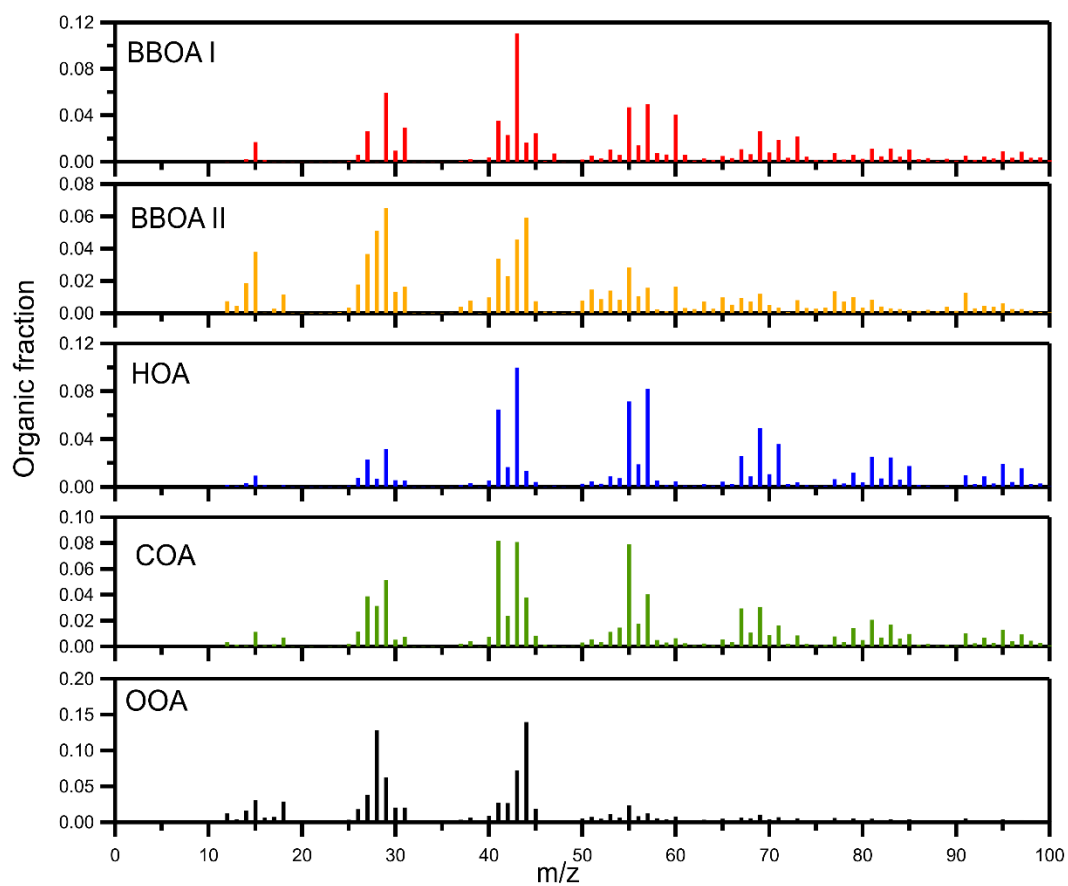

**Figure S3:** Organic mass spectra of the on-line PMF solution for the Patras 2020 winter campaign.

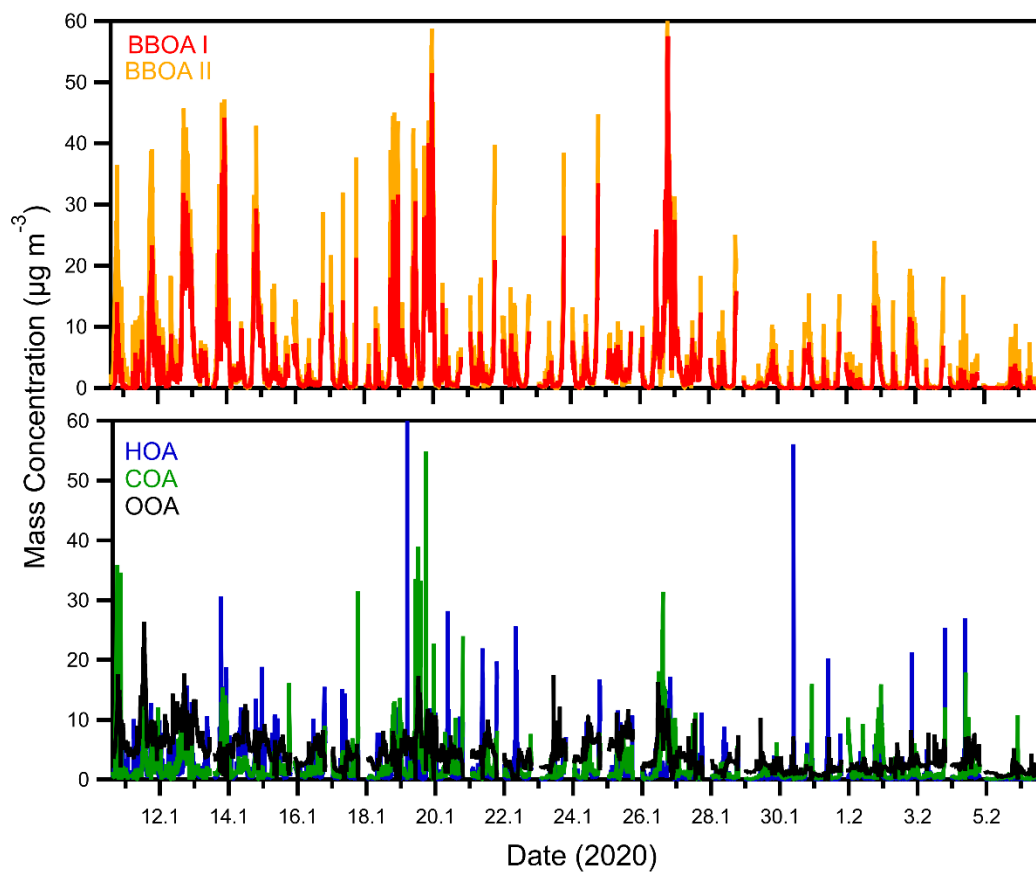

**Figure S4:** Time series of the on-line PMF solution for the Patras 2020 winter campaign.

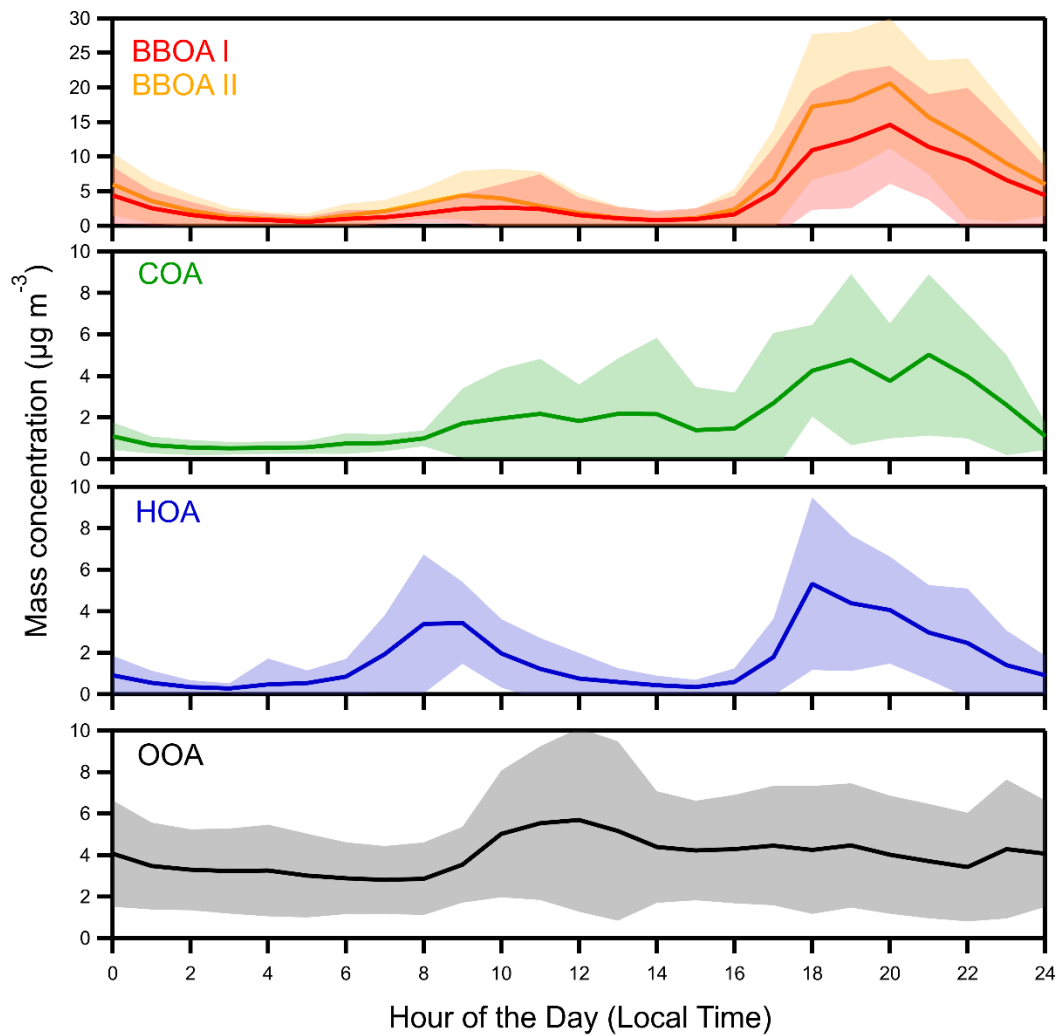

**Figure S5:** Average diurnal profile of the factors derived from the on-line PMF analysis during the winter of 2020 campaign in Patra. The shaded regions show the standard deviation of the mean.

## S1.2 Off-line

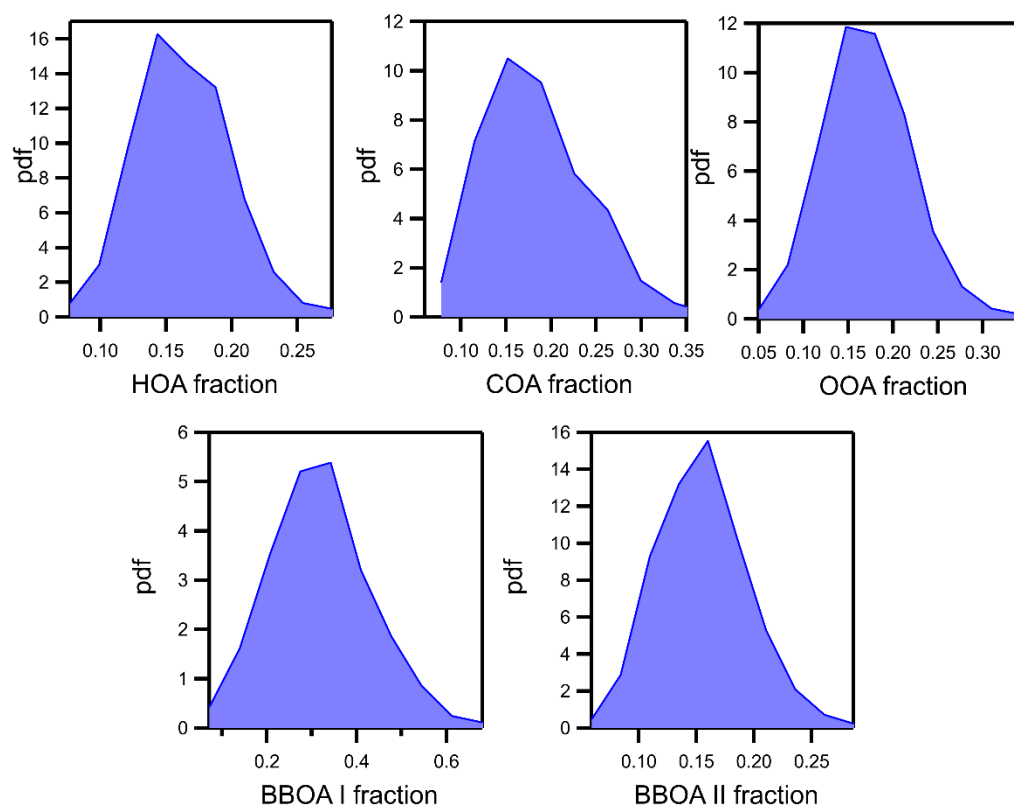

**Figure S6:** Off-line bootstrap analysis for the Patras 2020 winter campaign.

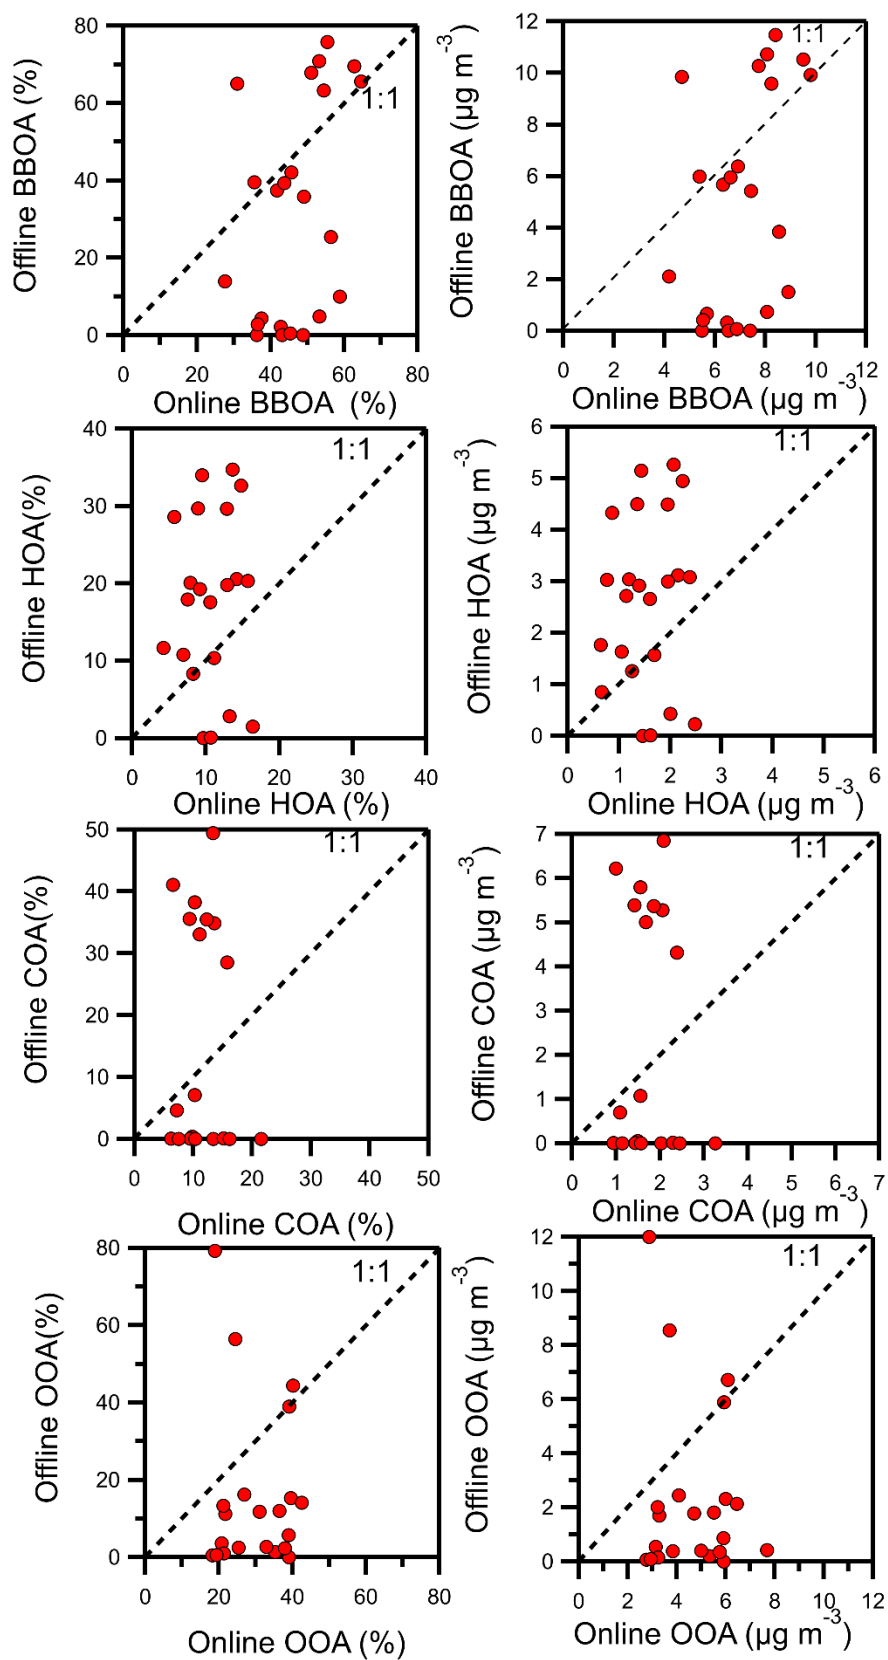

**Figure S7:** Comparison of the daily contribution of each factor between the on-line and the off-line PMF results for the Patras 2020 winter campaign.

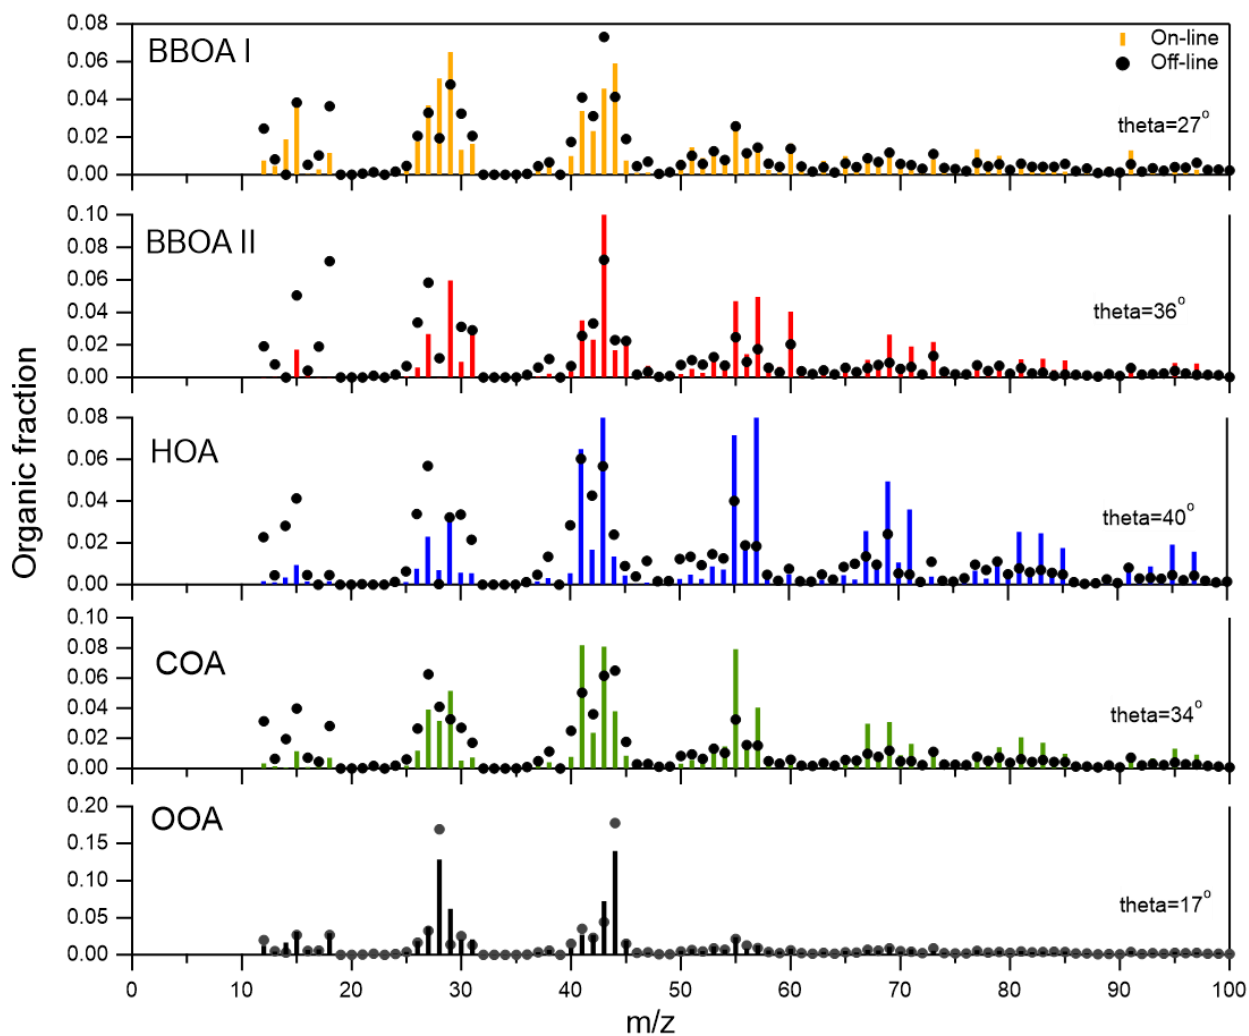

**Figure S8:** Comparison of off-line and on-line spectra of the PMF solution for the Patras 2020 winter campaign.

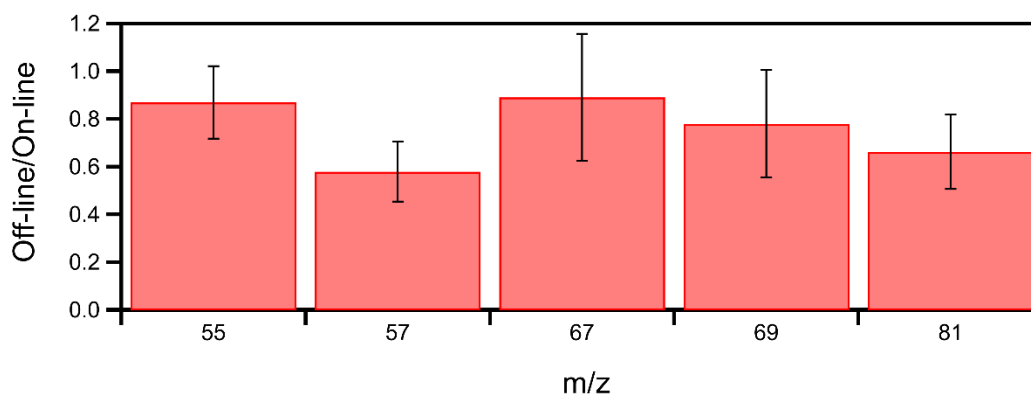

**Figure S9:** Off-line to on-line ratio for specific UMR HOA markers.



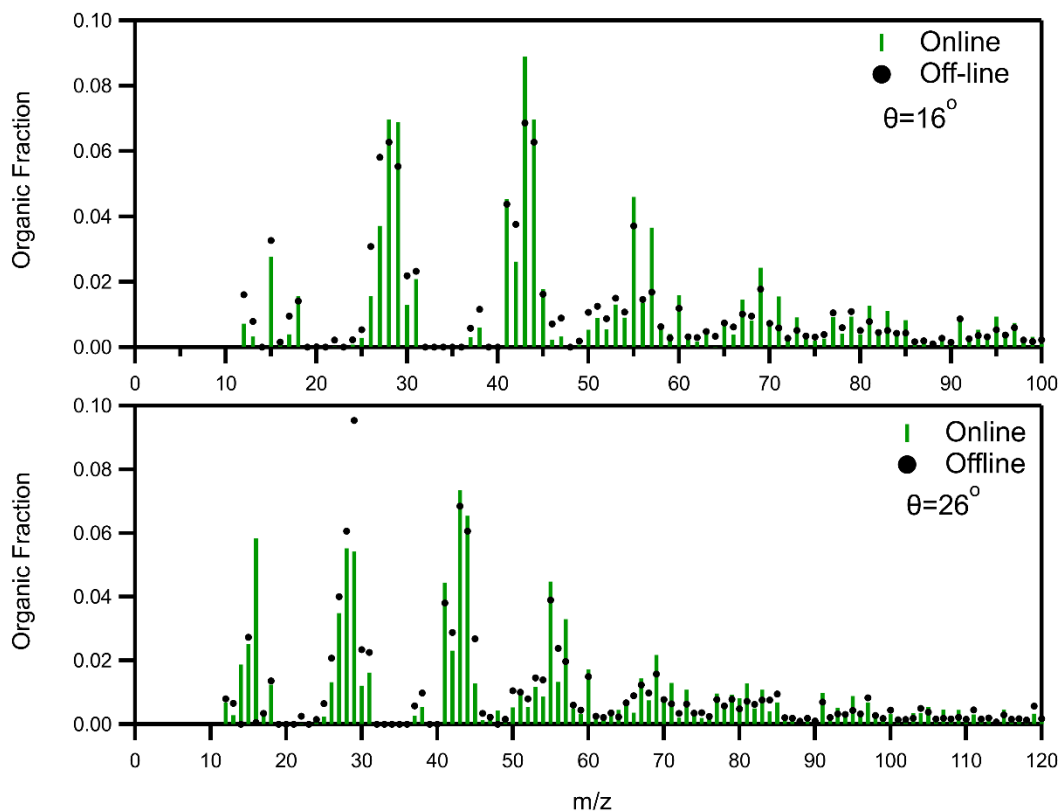

**Figure S10:** Comparison between the off-line and the on-line organic mass spectra for the day with the best and the worst agreement. The theta angle is also depicted. The ambient OA mass concentration was  $7 \mu\text{g m}^{-3}$  during the first day case (best correlation between on-line and off-line) and  $3 \mu\text{g m}^{-3}$  for the second (worst correlation between on-line and off-line).

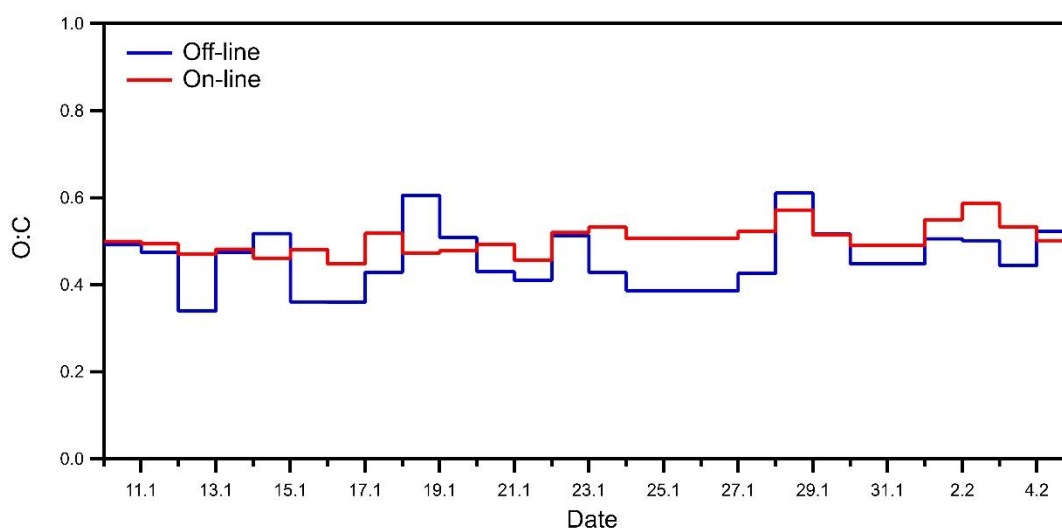

**Figure S11:** Atomic oxygen to carbon ratio (O:C) comparison between the off-line and the on-line results.

## S2. Summer campaign Patras 2019

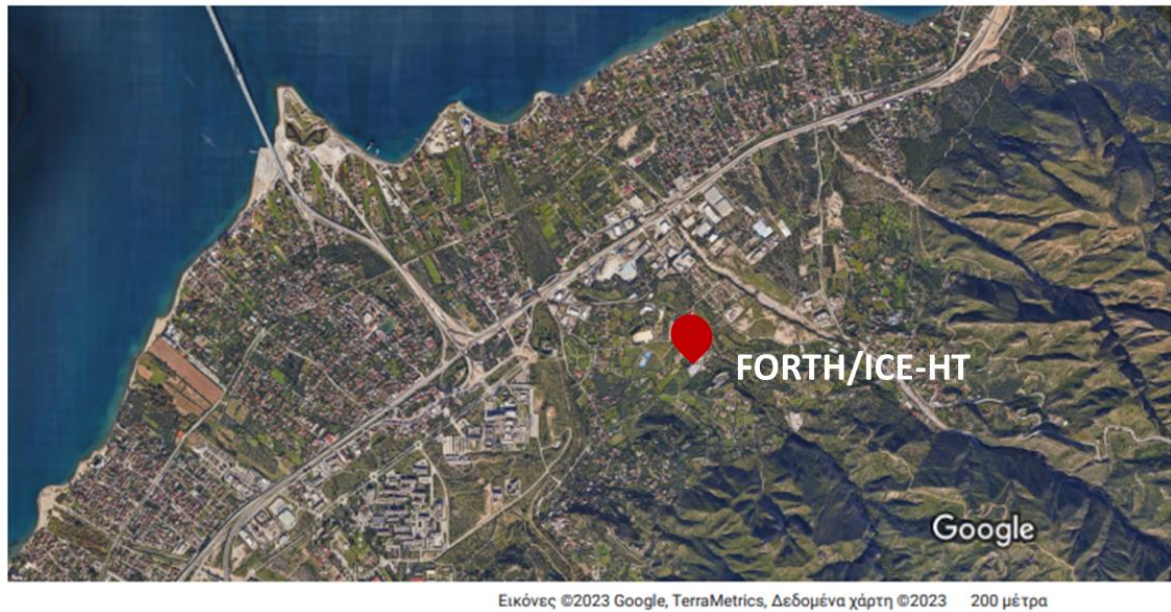

**Figure S12:** Map of the sampling site for the Patras 2019 summer campaign. The map was obtained by Google maps.

**Table S1:** Average Temperature per month for the Patras 2019 summer campaign

| Month | Average Temperature (°C) |
|-------|--------------------------|
| March | 16                       |
| April | 18                       |
| May   | 18                       |
| June  | 26                       |

## S2.1 On-line

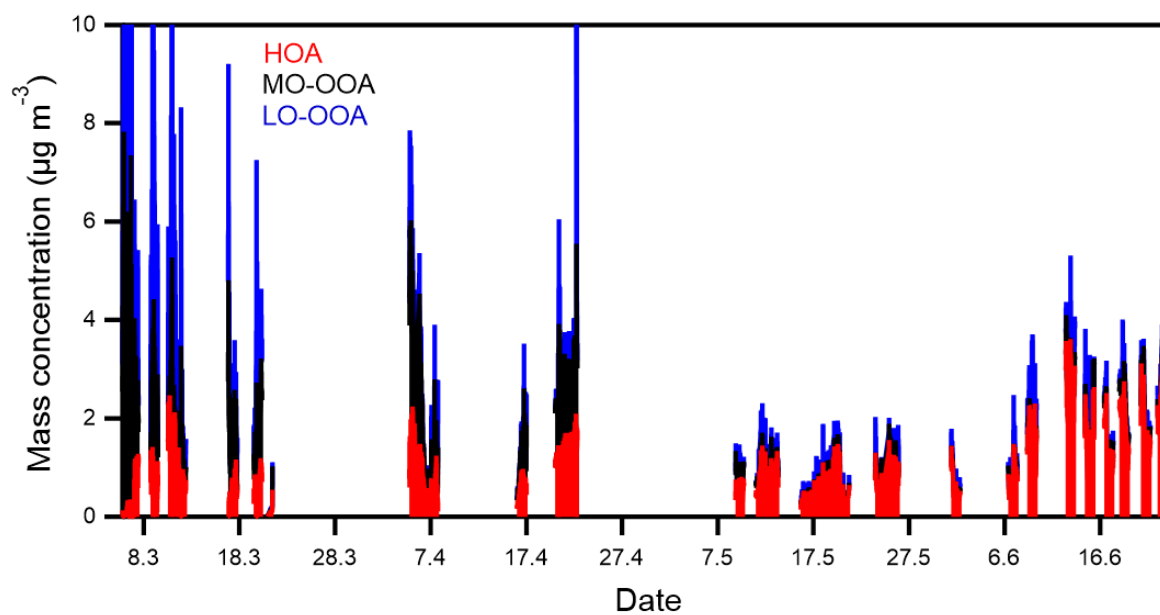

**Figure S13:** Time series of the three factors derived from the PMF analysis of the on-line measurements.

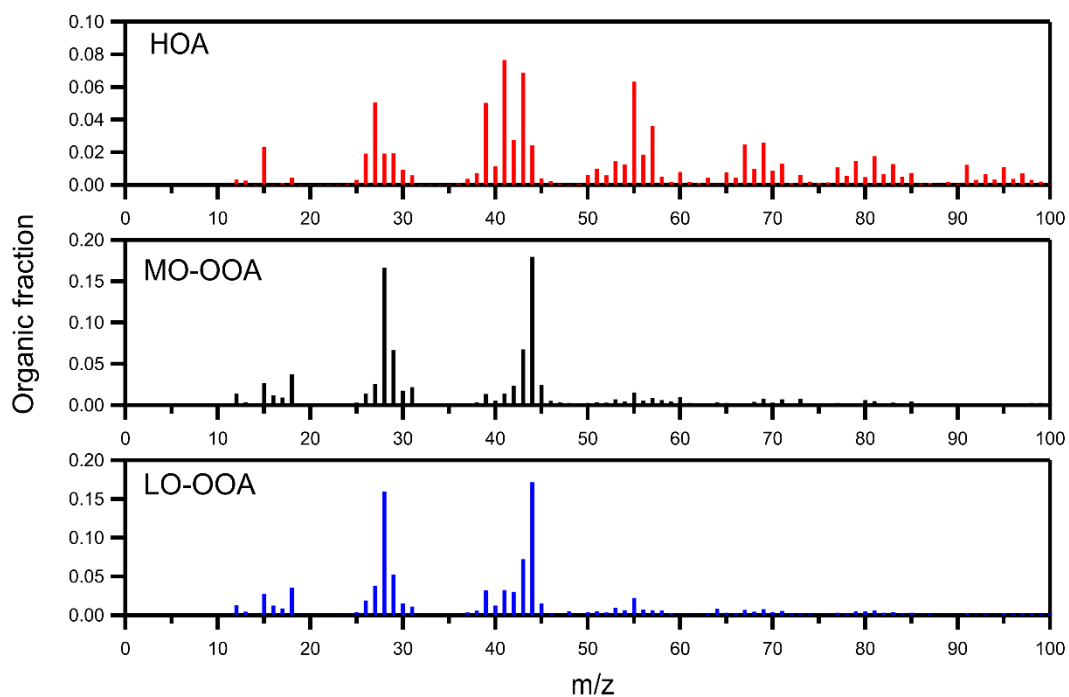

**Figure S14:** Organic mass spectra of the on-line PMF solution for the summer 2019 campaign.

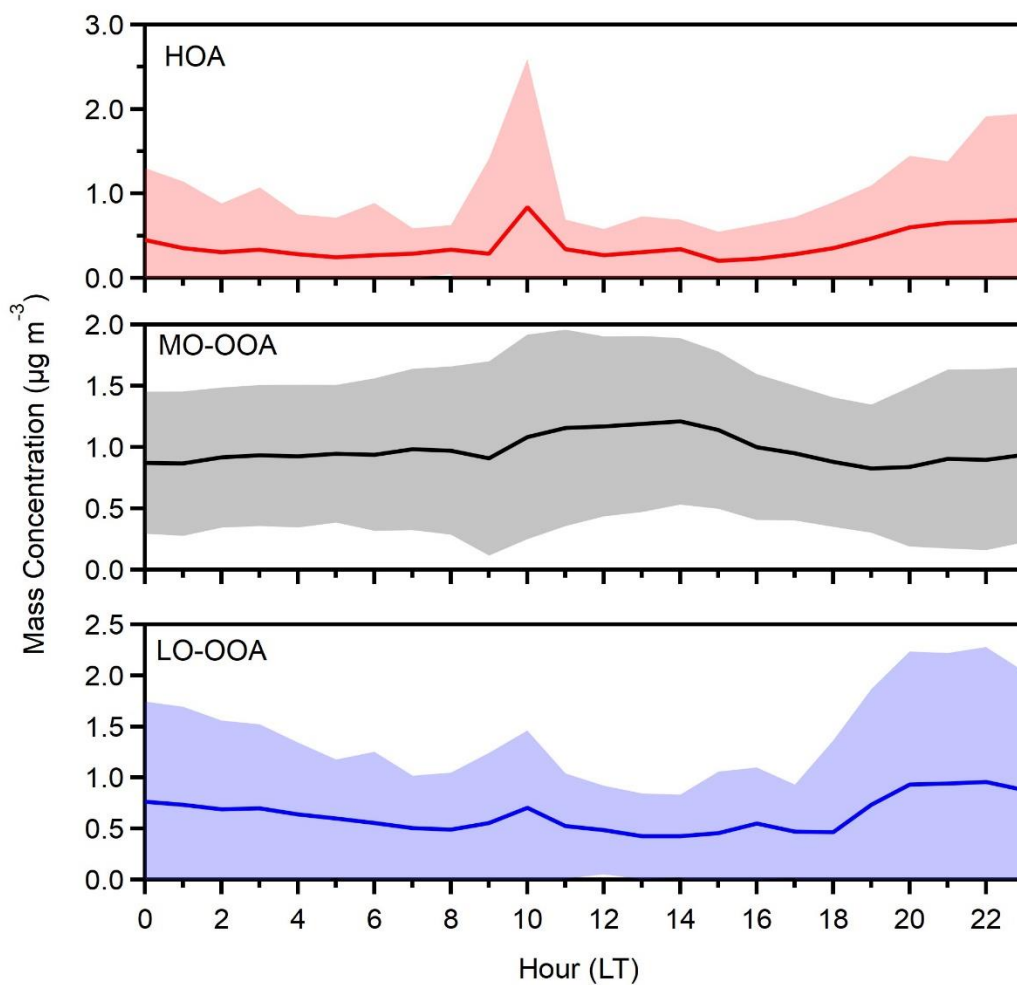

**Figure S15:** Diurnal profiles of the three factors derived from the on-line PMF analysis for the summer 2019 campaign.

## S2.2 Off-line

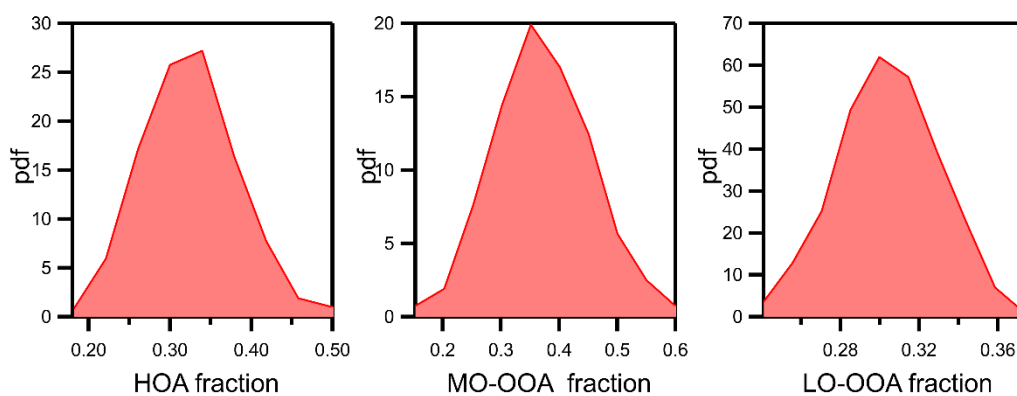

**Figure S16:** Off-line bootstrap analysis for the summer 2019 campaign.

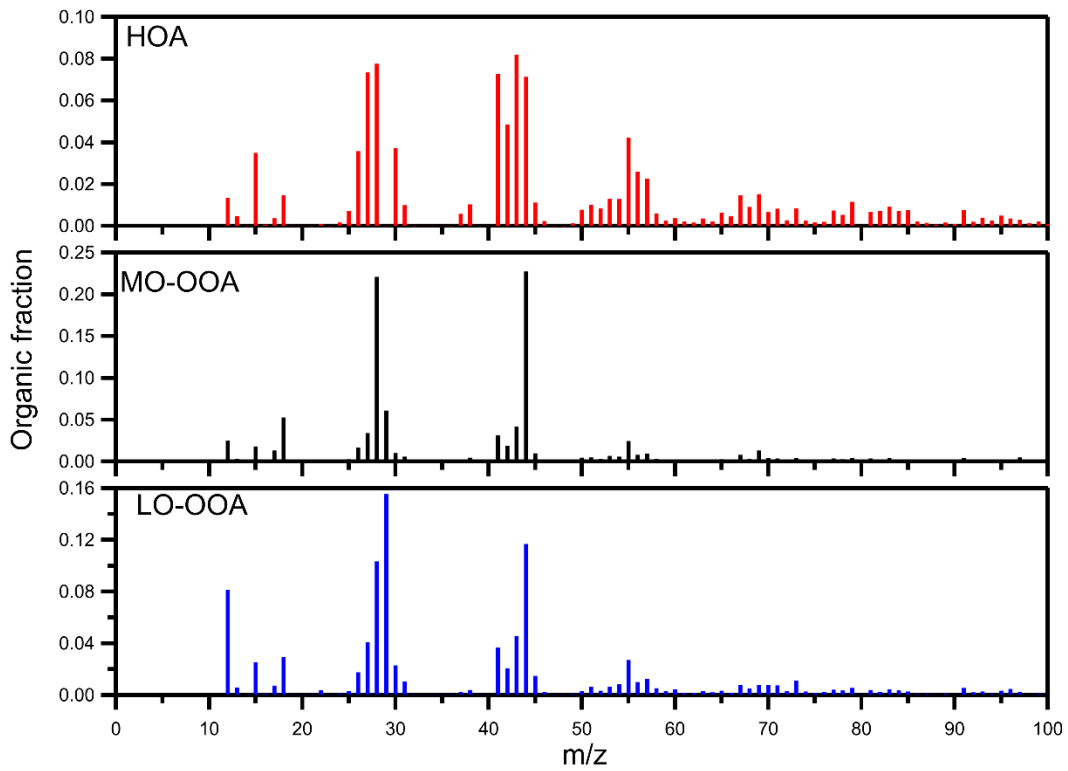

**Figure S17:** Organic mass spectra of the off-line PMF results for the summer 2019 campaign.

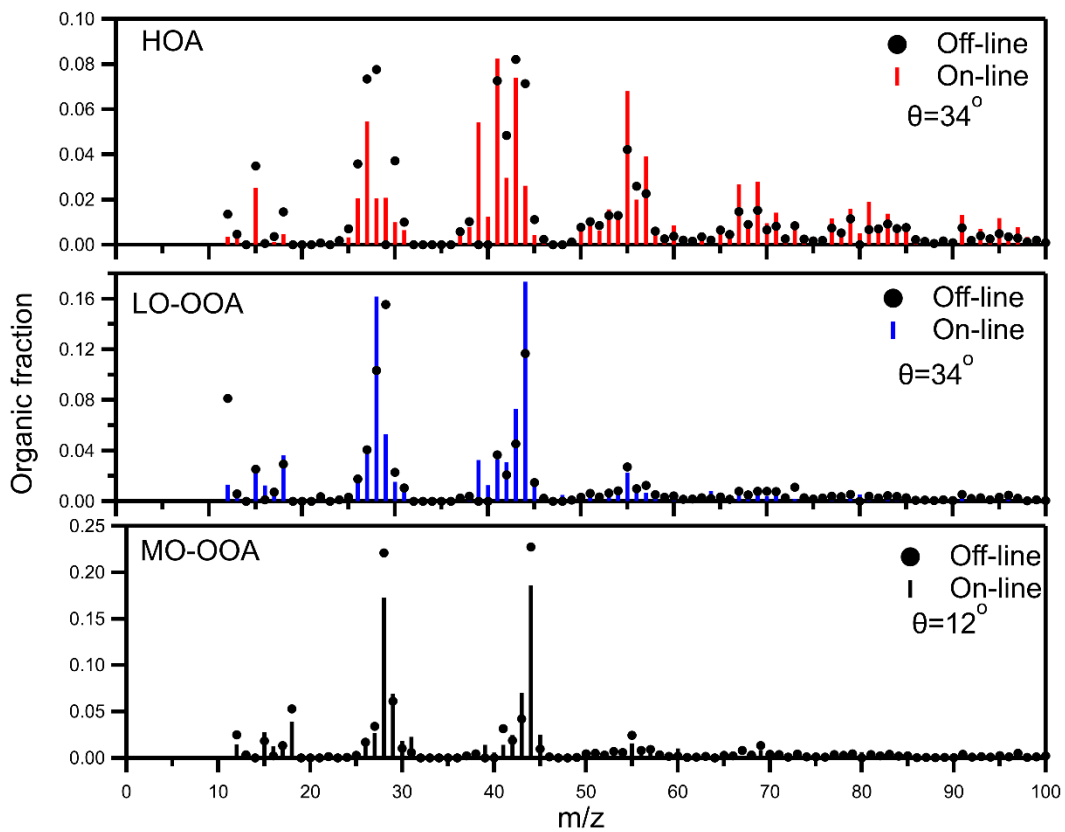

**Figure S18:** Spectra comparison between the on-line and the off-line PMF solution for the summer 2019 campaign.

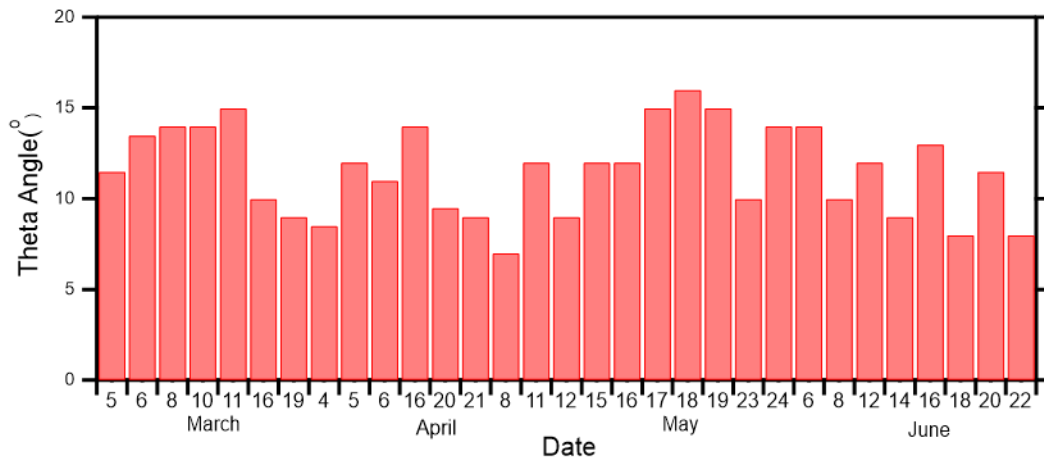

**Figure S19:** Comparison of off-line and on-line AMS spectra for the summer 2019 Patras campaign.

### S3. Athens campaign 2019

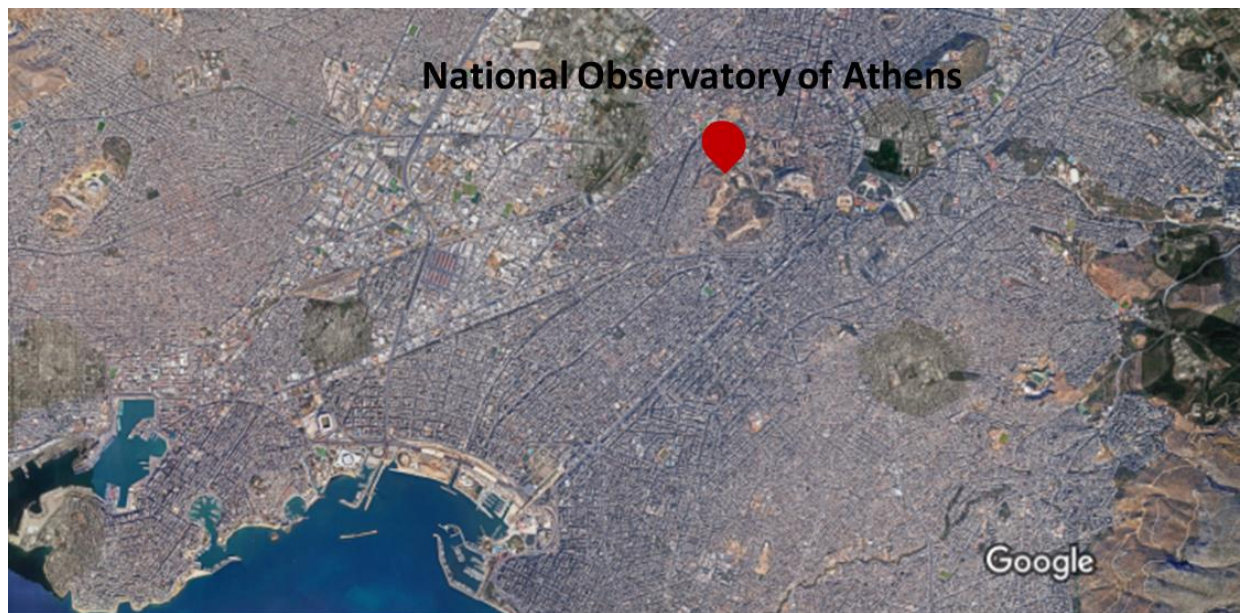

Εικόνες ©2023 Google, Εικόνες ©2023 Airbus, CNES / Airbus, Landsat / Copernicus, Maxar Technologies, Δεδομένα χάρτη ©2023 500 μέτρα

**Figure S20:** Map of the sampling site for the Athens 2019 winter campaign. The map was obtained by Google maps.

**Table S2:** Average temperature per month for the Athens 2019 winter campaign

| Month    | Average Temperature (°C) |
|----------|--------------------------|
| January  | 9                        |
| February | 9                        |
| March    | 13                       |

### S3.1 On-line

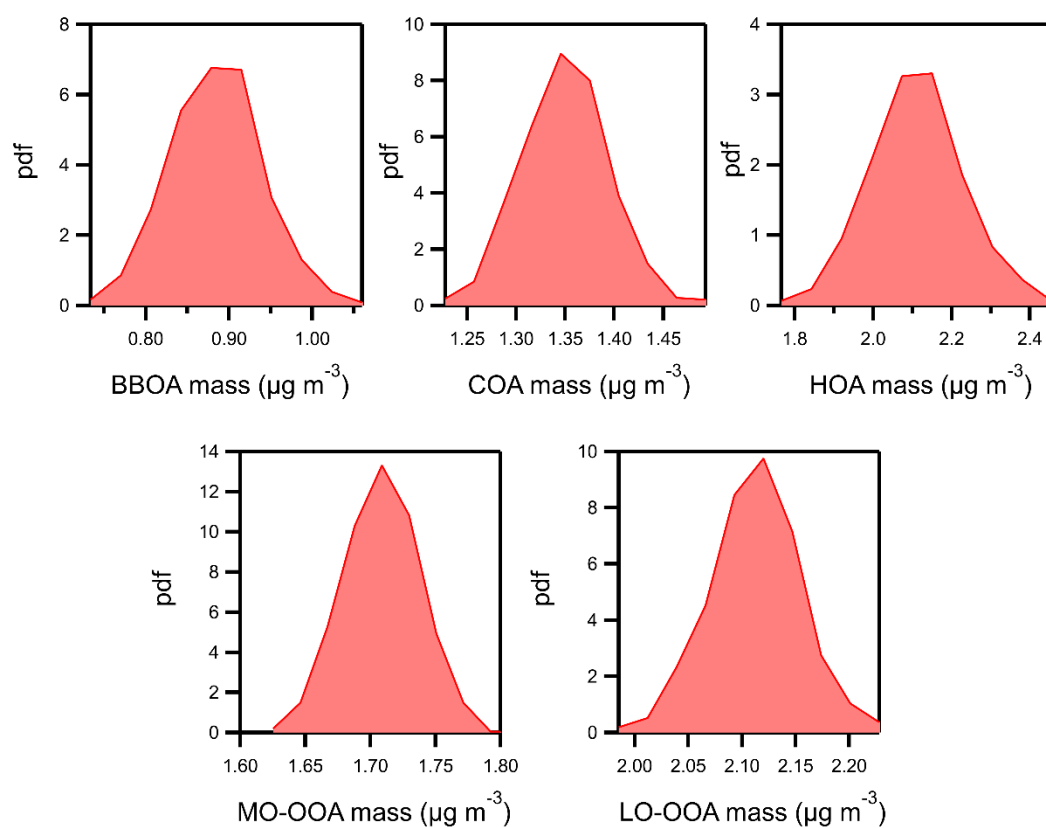

**Figure S21:** On-line bootstrap analysis of the Athens 2019 winter campaign.

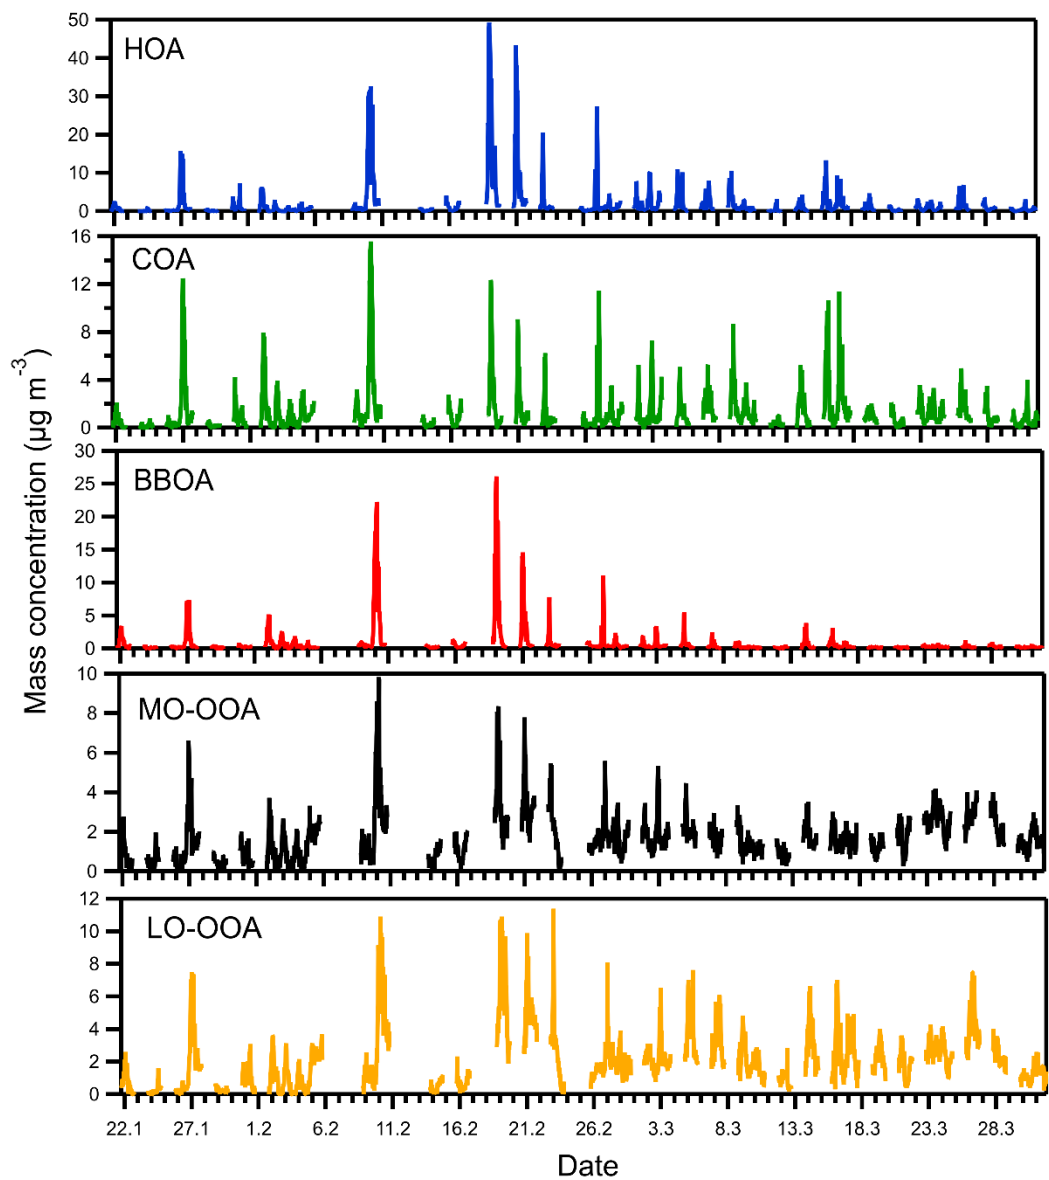

**Figure S22:** Time series of the 5 factors derived from the unconstrained on-line PMF solution for the Athens 2019 winter campaign.



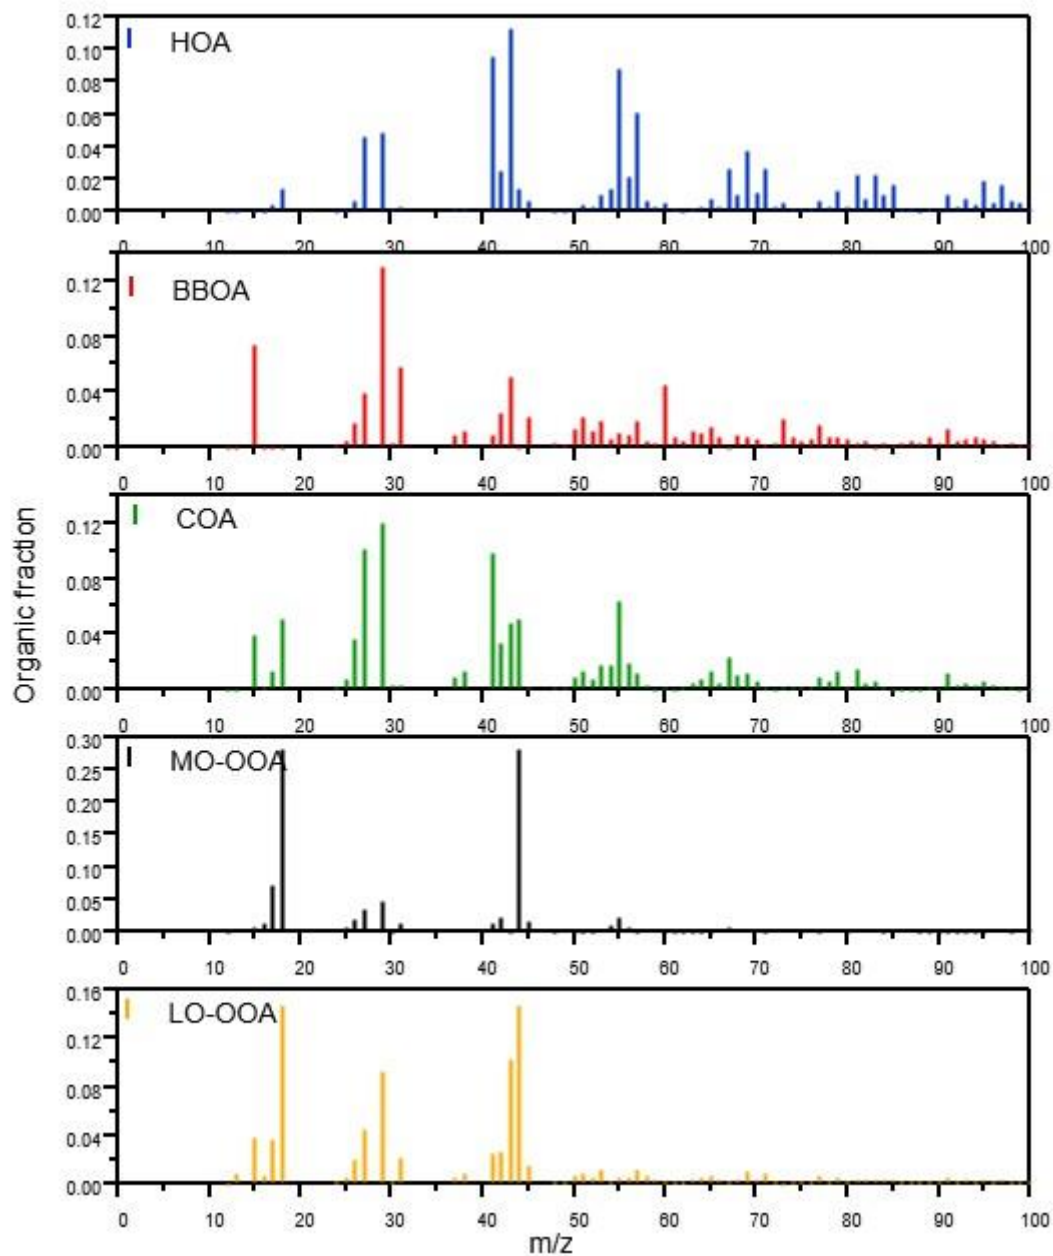

**Figure S23:** Organic mass spectra of the 5 factors derived from the unconstrained on-line PMF solution for the Athens 2019 winter campaign.

## S3.2 Off-line

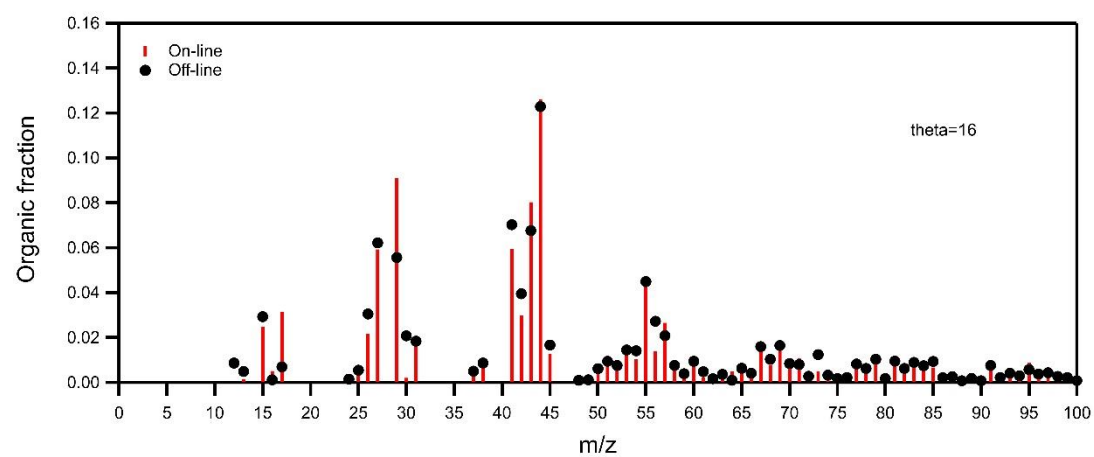

**Figure S24:** Comparison between the average on-line and the average off-line organic mass spectrum for the Athens 2019 winter campaign.

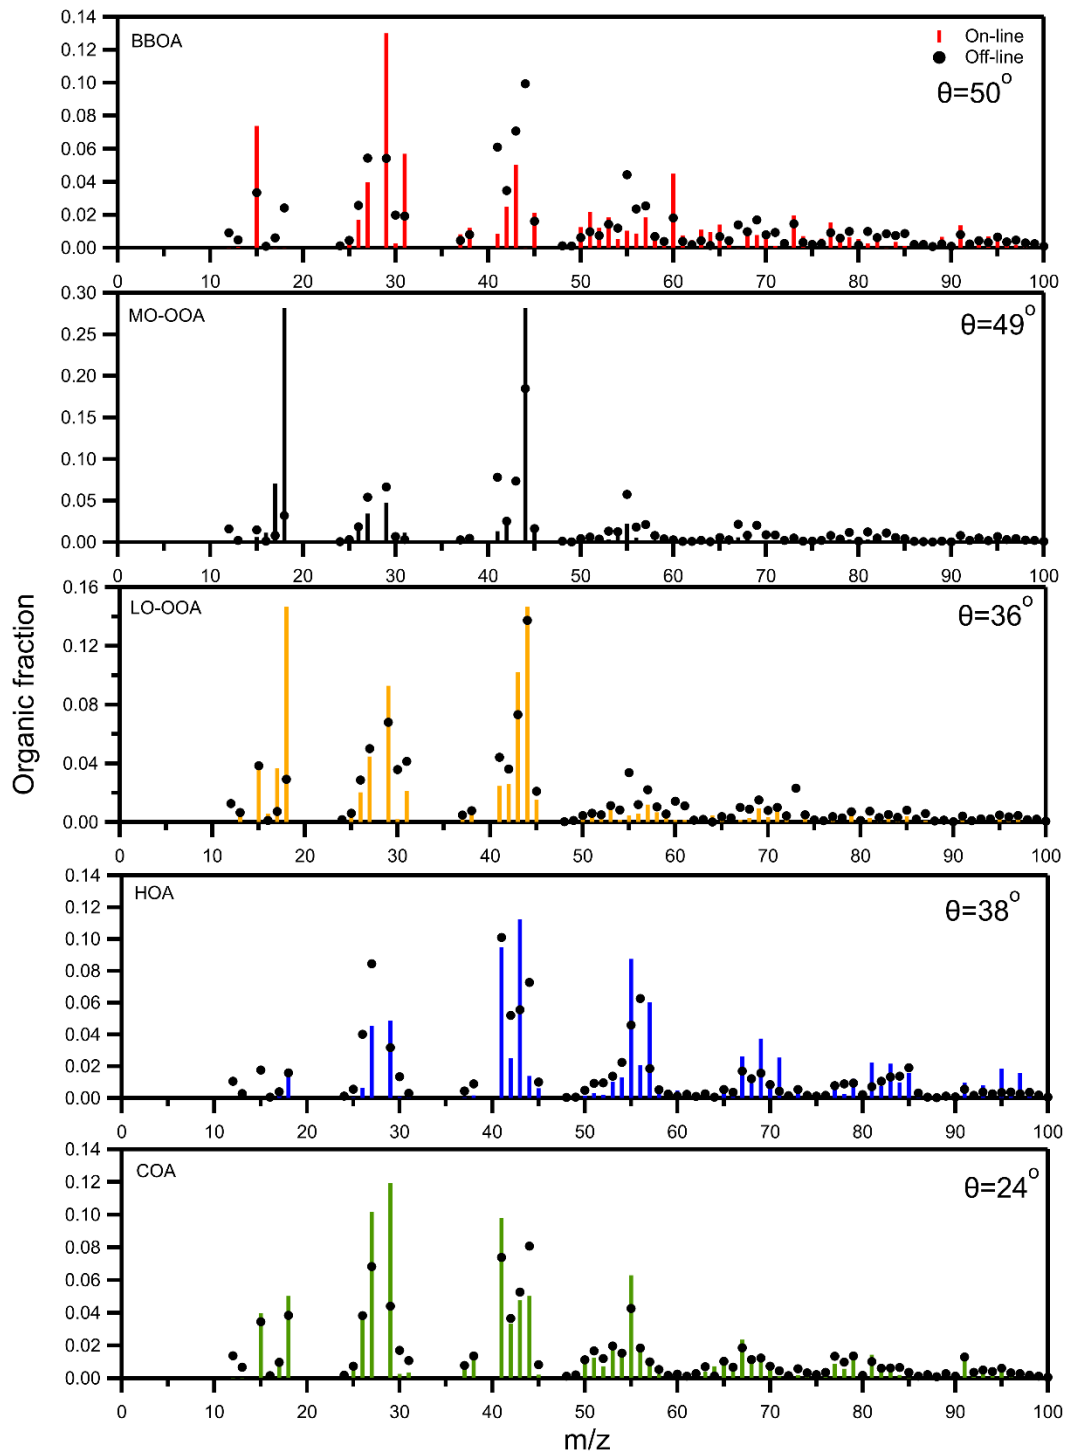

**Figure S25:** Spectra comparison between the on-line and the off-line PMF solution for the Athens 2019 winter campaign.

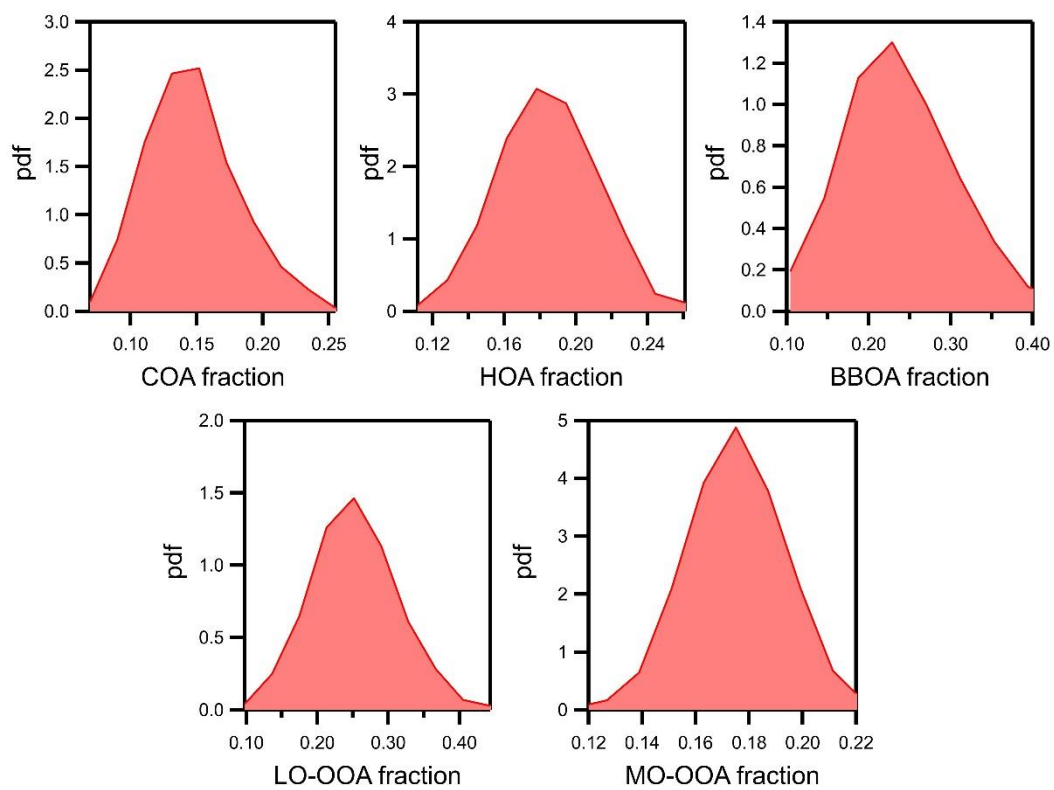

**Figure S26:** Off-line bootstrap analysis of the Athens 2019 winter campaign.

## S4. Sensitivity analysis HR to UMR off-line

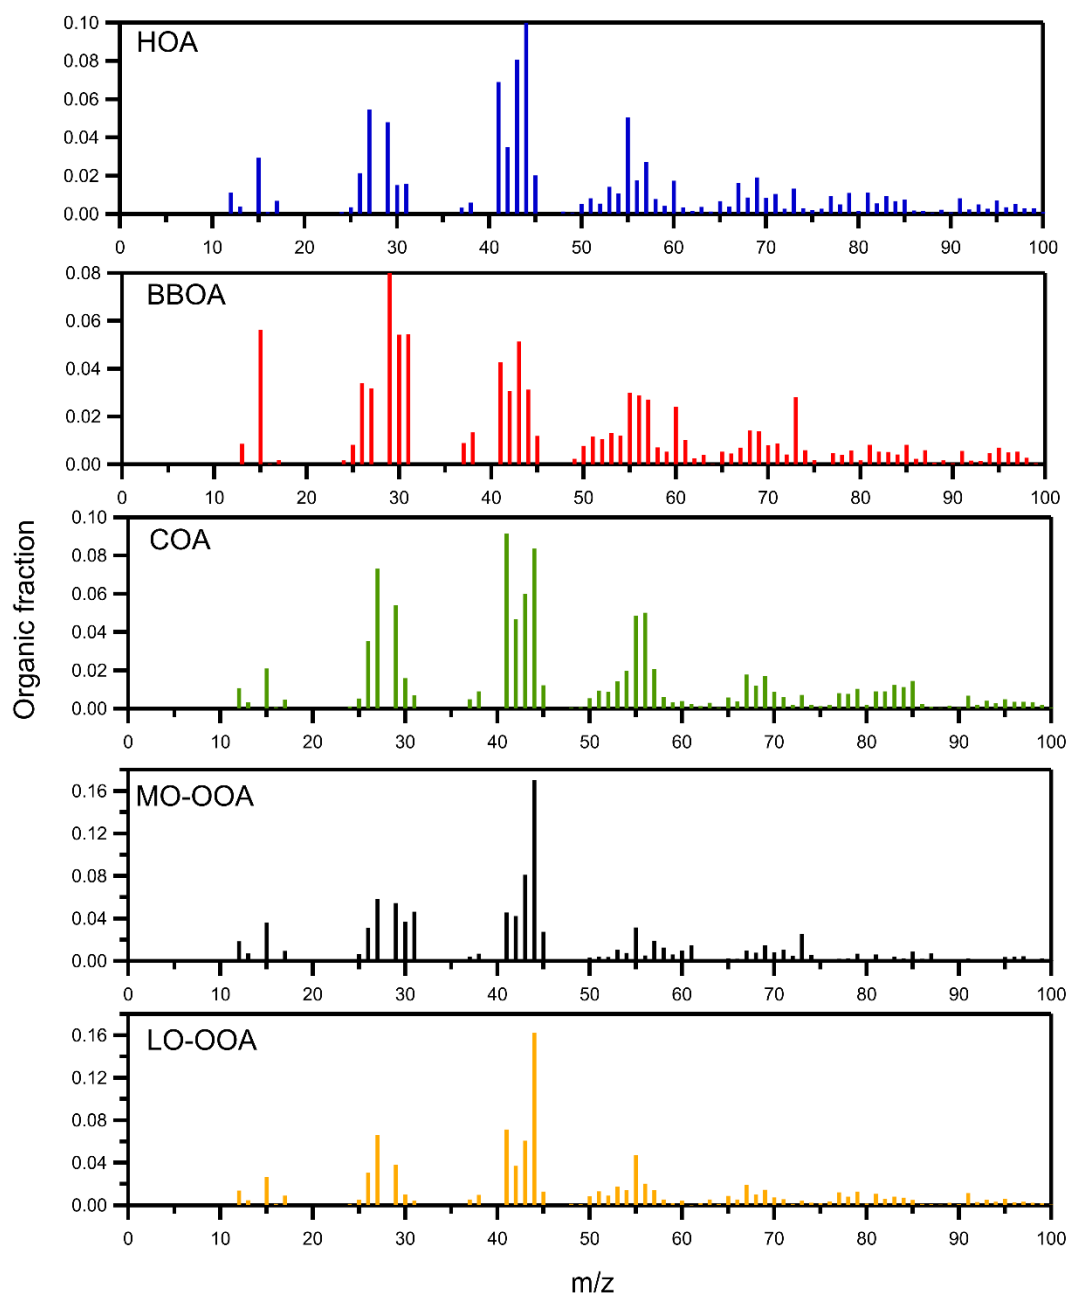

**Figure S27:** Organic mass spectra of the 5 factors derived from off-line UMR PMF solution for the Athens 2019 winter campaign.

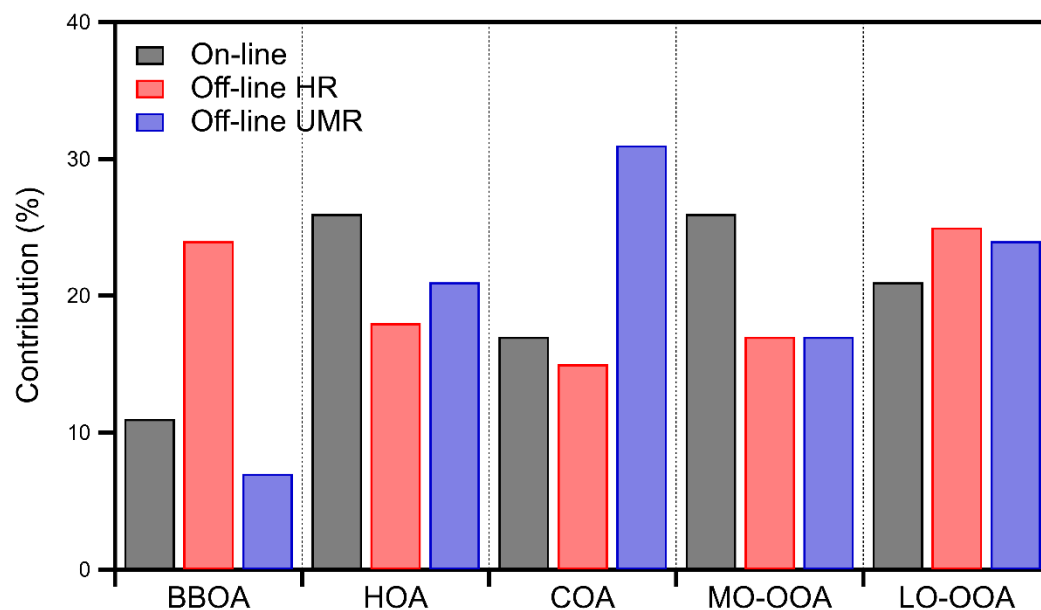

**Figure S28:** Comparison of the contribution of each factor to the total OA between the on-line the HR off-line and the UMR- on-line PMF analysis for the Athens 2019 winter campaign.

## S5. Measurements of suspended particles in the water extract

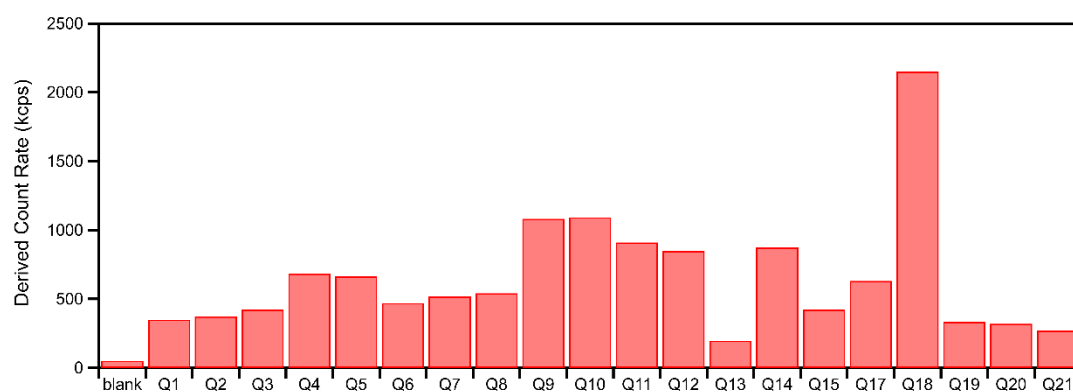

**Figure S29:** Derived count rate for the samples and the blank measured with the Zetasizer.

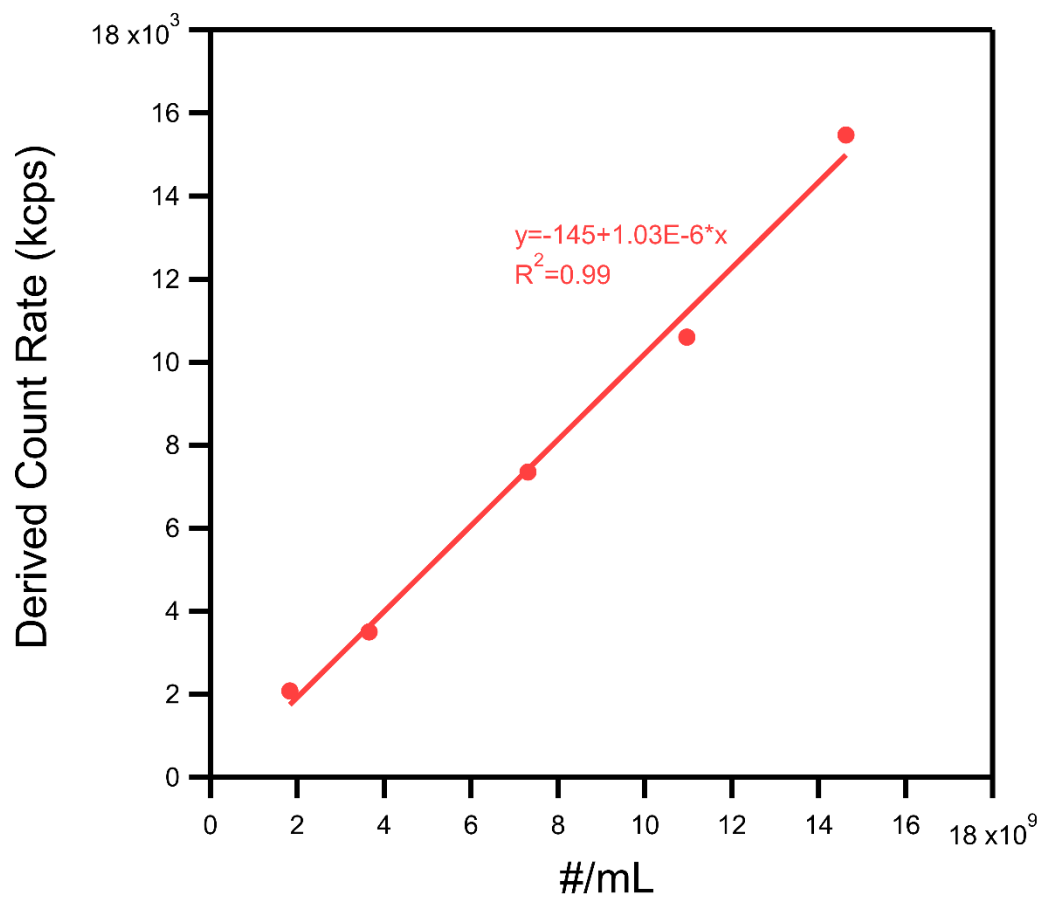

Figure S30: Calibration curve for the 100 nm PSL.
